# Supplementary material for: Glycosmis pentaphylla (Rutaceae): A Natural Candidate for the Isolation of Potential Bioactive Arborine and Skimmianine Compounds for Controlling Multidrug-Resistant Staphylococcus aureus
Source: PubMed Central journal article supplement (PMC7297912; doi:10.3389/fpubh.2020.00176), 2020-06-10
Supplement: Data_Sheet_1.pdf [file Data_Sheet_1.pdf]

## SUPPLEMENTARY DATA

**“*Glycosmis pentaphylla* (Rutaceae): A Natural candidate for the isolation of potential bioactive arborine and skimmianine compounds for controlling Multidrug Resistant *Staphylococcus aureus*”**

**Natarajan Murugan<sup>1,†</sup>, Ramalingam Srinivasan<sup>1,2,3,†</sup>, Athiappan Murugan<sup>4</sup>, Myunghee Kim<sup>2,¶</sup>, Devarajan Natarajan<sup>1,\*</sup>**

<sup>1</sup>Natural Drug Research Laboratory, Department of Biotechnology, School of Biosciences, Periyar University, Periyar Palkalai Nagar, Salem 636 011, Tamil Nadu, India

<sup>2</sup>Department of Food Science and Technology, Yeungnam University, Gyeongsan, Gyeongsangbuk-do 38541, Republic of Korea

<sup>3</sup>Department of Biotechnology, K. S. Rangasamy College of Arts and Science, K. S. R. Kalvi Nagar, Tiruchengode 637 215, Namakkal, Tamil Nadu, India

<sup>4</sup>Department of Microbiology, School of Biosciences, Periyar University, Periyar Palkalai Nagar, Salem 636 011, Tamil Nadu, India

<sup>†</sup>These authors contributed equally to this work.

**Running Title:** Arborine and Skimmianine for control of MDR *S. aureus*.

**\*Corresponding author:** Dr. Natarajan Devarajan, Department of Biotechnology, Periyar University, Periyar Palkalai Nagar, Salem 636 011, Tamil Nadu, India. Tel: +91-94-4385-7440; E-mail: natarajpu@gmail.com

**¶Co-corresponding author:** Dr. Myunghee Kim, Department of Food Science and Technology, College of Life and Applied Sciences, Yeungnam University, Gyeongsan-si, Gyeongsangbuk-do 38541, Republic of Korea. Tel.: +82-53-810-2958; Fax: +82 53-810-4662; E-mail: foodtech@ynu.ac.kr

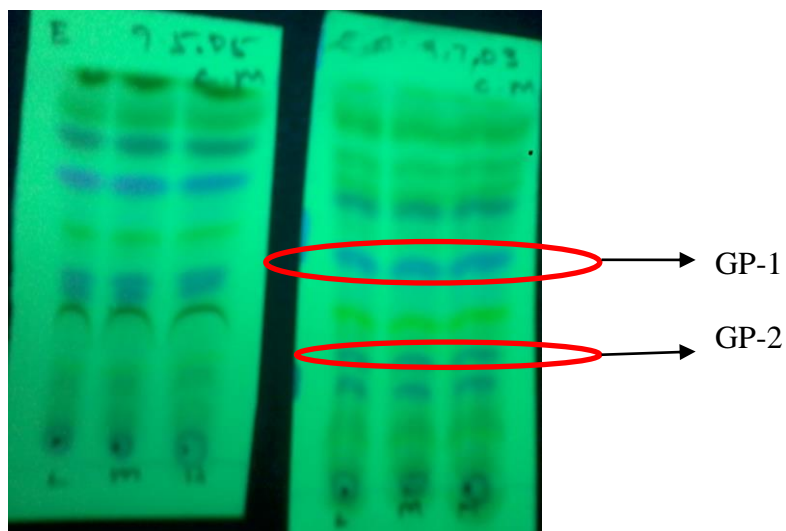

**FIGURE S1.** TLC chromatogram of ethyl acetate fraction of *G. pentaphylla*

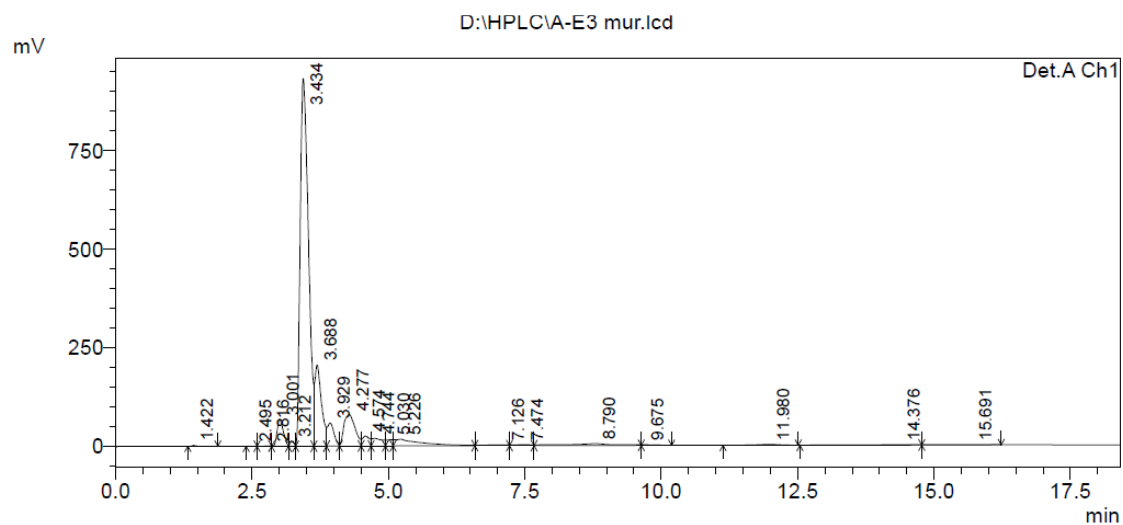

**FIGURE S2.** HPLC analysis of isolated compounds from ethyl acetate fraction of *G. pentaphylla*

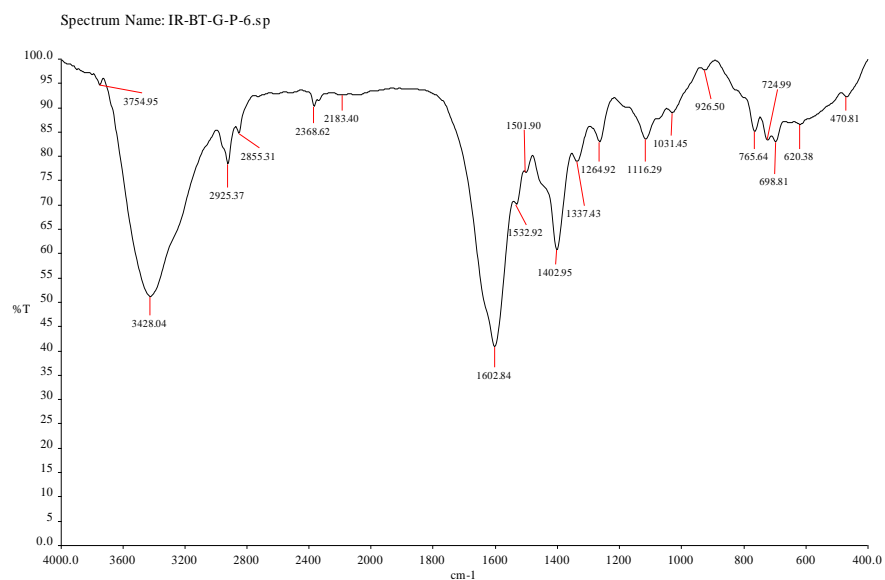

**FIGURE S3. FT-IR spectrum of arborine**

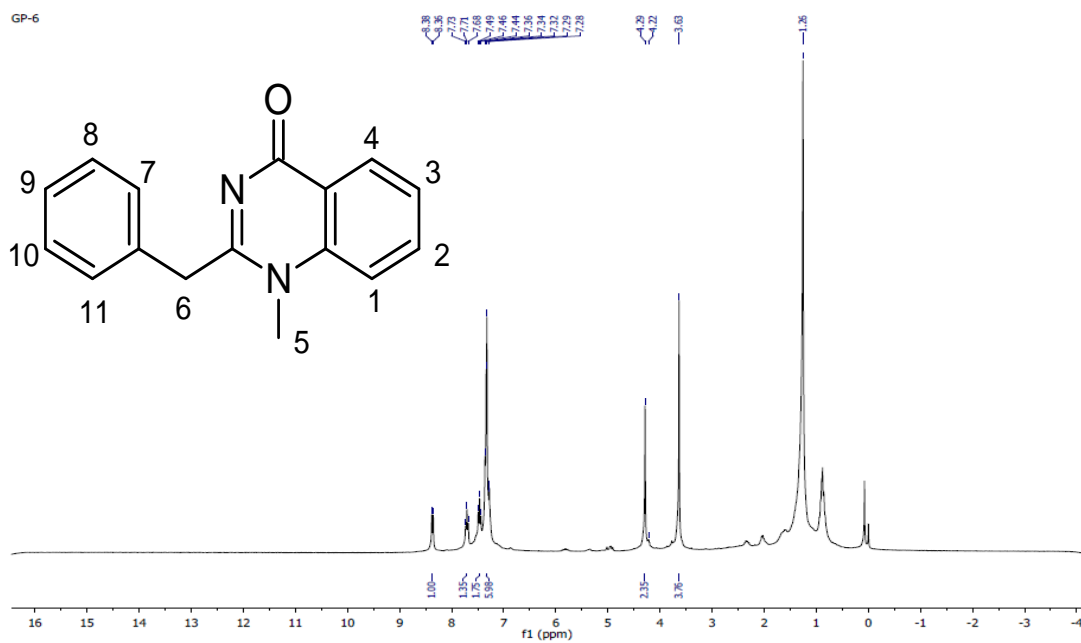

**FIGURE S4. <sup>1</sup>H-NMR spectrum of arborine**

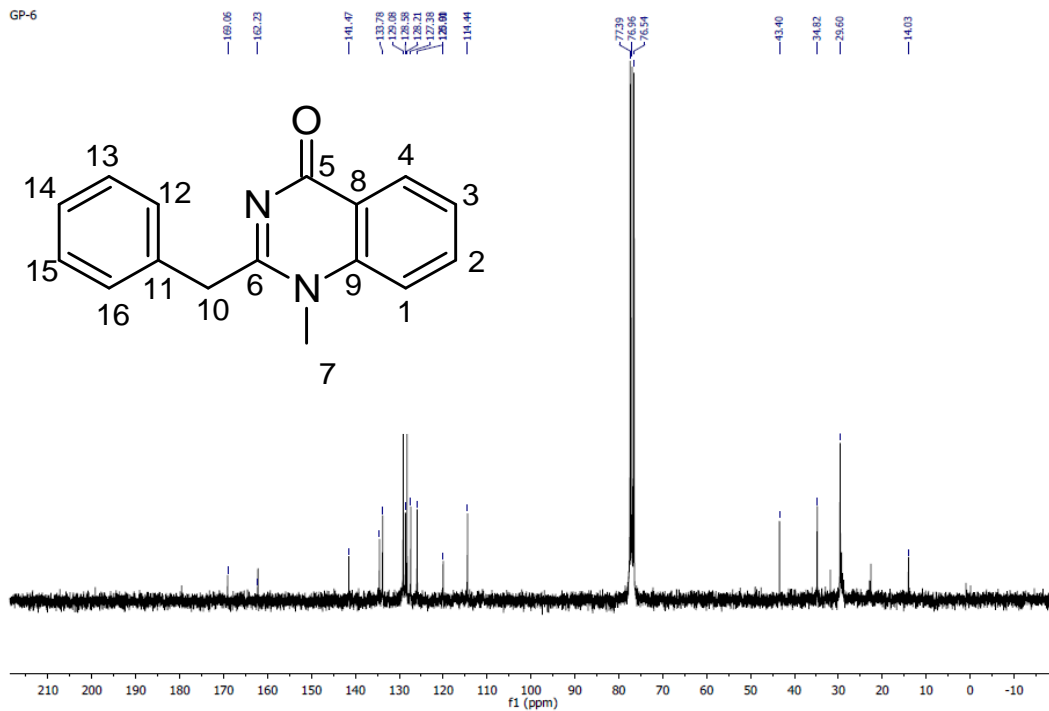

**FIGURE S5. <sup>13</sup>C-NMR spectrum of arborine**

R.Time:16.167(Scan#:971)  
 MassPeaks:454 BasePeak:251(26285)  
 Spectrum Mode:Averaged 14.800-21.283(889-1278)  
 BG Mode:Averaged 23.333-30.100(1401-1807) Polarity:Positive Segment 1 - Event 1

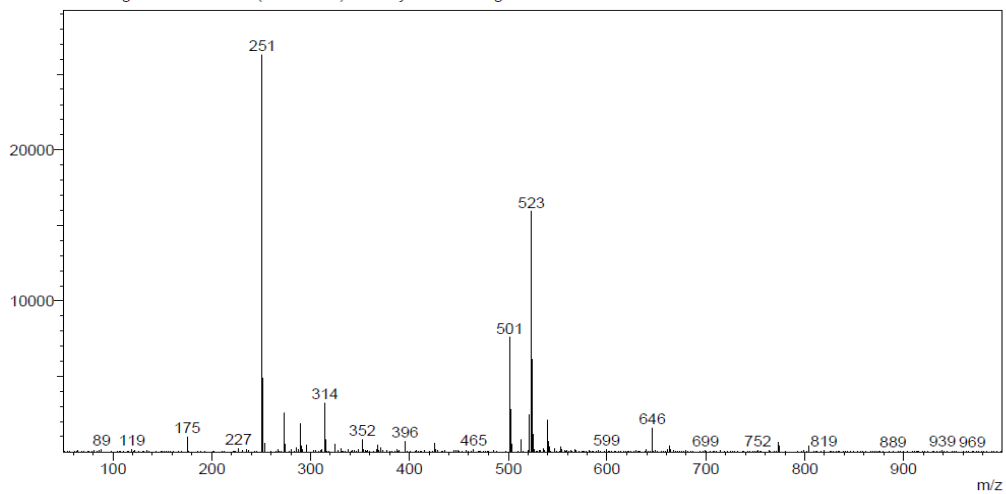

**FIGURE S6. Mass spectrum of arborine**

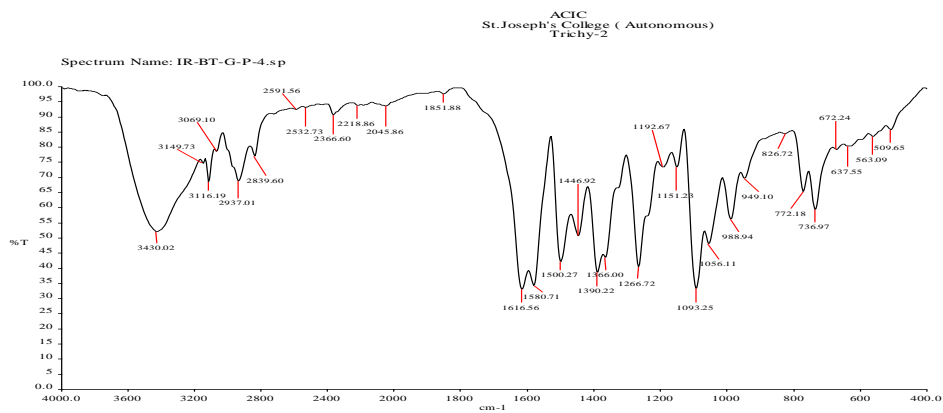

**FIGURE S7. FT-IR spectrum of skimmianine**

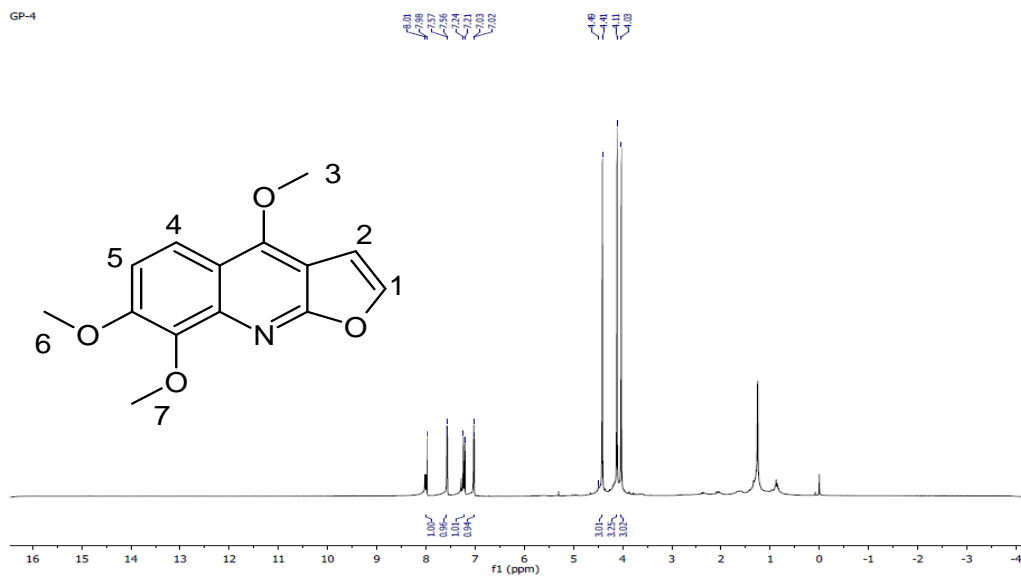

**FIGURE S8. <sup>1</sup>H-NMR spectrum of skimmianine**

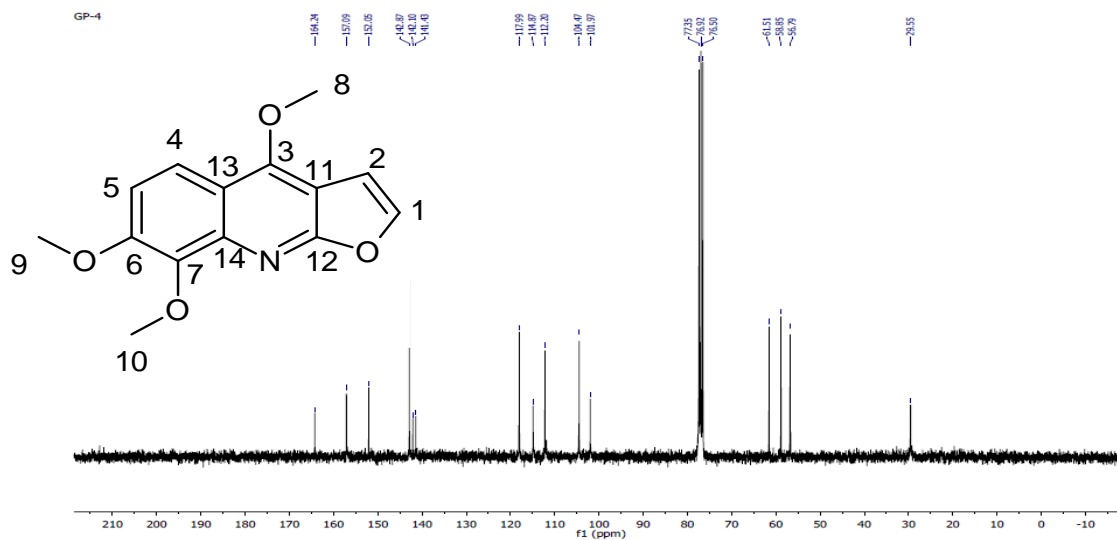

**FIGURE S9.** <sup>13</sup>C-NMR spectrum of skimmianine

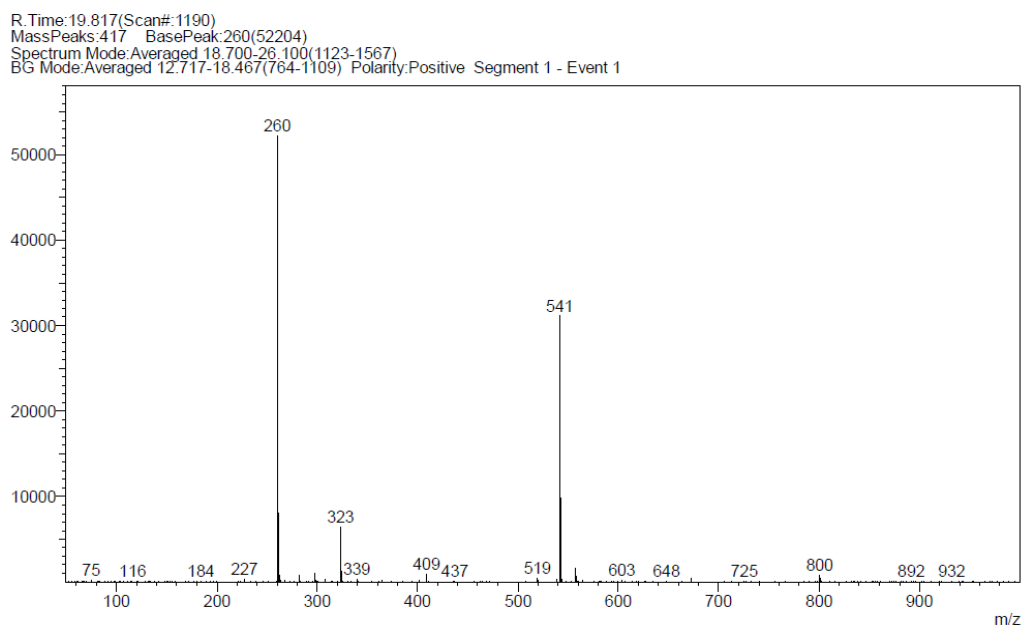

**FIGURE S10.** Mass spectrum of skimmianine
